# Supplementary material for: Antiviral treatment for treatment-naïve chronic hepatitis B: systematic review and network meta-analysis of randomized controlled trials
Source: PubMed Central journal article supplement (PMC6699129; doi:10.1186/s13643-019-1126-1), 2019-08-19
Supplement: 13643_2019_1126_MOESM5_ESM.pdf [file 13643_2019_1126_MOESM5_ESM.pdf]

## **Appendix E: Network inconsistency evaluation**

Inconsistency tests evaluate the validity of the consistency assumption in a network meta-analysis by assessing the compatibility of direct and indirect evidence. If the results from direct evidence conflict against the results from indirect evidence, then this highlights a problem of inconsistency in the network. In this case, one could argue that the direct and indirect evidence may not be compatible.

To evaluate inconsistency in the networks, we used a node-splitting method that excludes evidence from multi-arm studies. This method tests for the presence of sufficient evidence in the network to indicate the presence of inconsistency. Therefore, in the tables below any p-values below 0.05 would indicate that the difference in effect size between direct and indirect evidence is statistically significant from zero, and therefore inconsistency exists in the model. Absence of inconsistency tests for some of the outcomes can be attributed to the presence of a large number of multi-arm studies for that outcome. The results below show indicate that inconsistency was detected in some of the comparators that were evaluated. Care should be taken in the interpretation of the findings, as inconsistency tests are usually underpowered, due to small number of studies or events. Therefore, the absence of statistical significance does not necessarily suggest consistency but rather absence of sufficient evidence to indicate inconsistency.

| <b>HBeAg positive population</b> |            | Direct Estimate |                      | Indirect Estimate |                      | NMA estimate |                      | Inconsistency  |
|----------------------------------|------------|-----------------|----------------------|-------------------|----------------------|--------------|----------------------|----------------|
| <i>Virological Response</i>      |            |                 |                      |                   |                      |              |                      |                |
| <b>T1</b>                        | <b>T2</b>  | <b>OR</b>       | <b>95% CI</b>        | <b>OR</b>         | <b>95% CI</b>        | <b>OR</b>    | <b>95% CI</b>        | <b>p-value</b> |
| ADV                              | ETV        | 1.85            | 0.01 - 3.77          | 1.65              | 0.38 - 2.97          | 1.7          | 0.7 - 2.71           | 0.851          |
| ADV                              | LDT        | 0.82            | -0.88 - 2.54         | 1.4               | -0.25 - 3.06         | 1.12         | -0.03 - 2.26         | 0.607          |
| ADV                              | TDF        | 2.9             | 1.77 - 4.06          | 2.63              | 0.9 - 4.34           | 2.81         | 1.92 - 3.73          | 0.773          |
| <b>ETV</b>                       | <b>LAM</b> | <b>-1</b>       | <b>-1.56 - -0.46</b> | <b>-3.05</b>      | <b>-4.19 - -1.84</b> | <b>-1.42</b> | <b>-2.24 - -0.67</b> | <b>0.01</b>    |
| <b>ETV</b>                       | <b>TDF</b> | <b>0.51</b>     | <b>-0.34 - 1.35</b>  | <b>2.25</b>       | <b>1.09 - 3.25</b>   | <b>1.12</b>  | <b>0.22 - 1.99</b>   | <b>0.02</b>    |
| LAM                              | LDT        | 0.92            | 0.02 - 1.86          | 0.36              | -1.87 - 2.57         | 0.84         | 0.04 - 1.67          | 0.606          |
| <b>LAM</b>                       | <b>PEG</b> | <b>1.15</b>     | <b>0.19 - 2.14</b>   | <b>-1.38</b>      | <b>-2.59 - -0.12</b> | <b>0.19</b>  | <b>-0.98 - 1.39</b>  | <b>0.006</b>   |
| <b>PEG</b>                       | <b>TDF</b> | <b>3.26</b>     | <b>2.34 - 4.23</b>   | <b>0.73</b>       | <b>-0.48 - 1.99</b>  | <b>2.35</b>  | <b>1.18 - 3.5</b>    | <b>0.006</b>   |
| <i>ALT norm</i>                  |            |                 |                      |                   |                      |              |                      |                |

|                              |            |             |                     |              |                      |              |                     |              |
|------------------------------|------------|-------------|---------------------|--------------|----------------------|--------------|---------------------|--------------|
| ADV                          | ETV        | 0.65        | -0.93 - 2.26        | 0.44         | -0.57 - 1.46         | 0.5          | -0.31 - 1.33        | 0.821        |
| ADV                          | LDT        | -0.48       | -2.13 - 1.12        | 0.49         | -0.71 - 1.78         | 0.15         | -0.8 - 1.09         | 0.315        |
| ADV                          | PLA        | -1.61       | -2.81 - -0.41       | -2.7         | -4.37 - -1.07        | -1.98        | -2.97 - -1.05       | 0.257        |
| ADV                          | TDF        | 0.42        | -0.55 - 1.37        | 0.64         | -0.8 - 1.94          | 0.49         | -0.28 - 1.2         | 0.78         |
| ETV                          | LAM        | -0.57       | -1.25 - 0.07        | -1.7         | -2.83 - -0.52        | -0.85        | -1.53 - -0.22       | 0.099        |
| ETV                          | TDF        | -0.38       | -1.3 - 0.47         | 0.61         | -0.56 - 1.59         | -0.01        | -0.78 - 0.69        | 0.156        |
| LAM                          | LDT        | 0.62        | -0.09 - 1.42        | -0.34        | -2.27 - 1.53         | 0.5          | -0.17 - 1.19        | 0.322        |
| <b>LAM</b>                   | <b>PEG</b> | <b>0.58</b> | <b>-0.09 - 1.25</b> | <b>-1.2</b>  | <b>-2.13 - -0.19</b> | <b>-0.02</b> | <b>-0.97 - 0.88</b> | <b>0.012</b> |
| LAM                          | PLA        | -2.11       | -3.48 - -0.77       | -1.02        | -2.54 - 0.55         | -1.63        | -2.65 - -0.64       | 0.262        |
| <b>PEG</b>                   | <b>TDF</b> | <b>1.52</b> | <b>0.8 - 2.25</b>   | <b>-0.26</b> | <b>-1.13 - 0.73</b>  | <b>0.87</b>  | <b>-0.07 - 1.79</b> | <b>0.012</b> |
| <i>HBeAg loss</i>            |            |             |                     |              |                      |              |                     |              |
| ADV                          | ETV        | -0.23       | -1.57 - 1.03        | 0.16         | -0.53 - 0.86         | 0.07         | -0.55 - 0.68        | 0.602        |
| ADV                          | LDT        | 0.48        | -0.6 - 1.57         | 0.39         | -0.39 - 1.18         | 0.4          | -0.21 - 1.04        | 0.89         |
| ADV                          | PLA        | -1          | -1.75 - -0.28       | -0.78        | -1.91 - 0.32         | -0.94        | -1.56 - -0.33       | 0.737        |
| ADV                          | TDF        | 0.65        | -0.26 - 1.62        | 0.24         | -0.64 - 1.12         | 0.44         | -0.21 - 1.08        | 0.506        |
| ETV                          | LAM        | -0.04       | -0.44 - 0.37        | 0.21         | -0.69 - 1.08         | 0            | -0.36 - 0.36        | 0.594        |
| ETV                          | PLA        | -1.89       | -5.56 - 0.72        | -0.95        | -1.68 - -0.21        | -1.01        | -1.69 - -0.3        | 0.516        |
| ETV                          | TDF        | 0.46        | -0.25 - 1.2         | 0.22         | -0.6 - 1.07          | 0.37         | -0.15 - 0.9         | 0.635        |
| LAM                          | LDT        | 0.34        | -0.01 - 0.72        | 0.46         | -0.81 - 1.77         | 0.34         | 0.01 - 0.69         | 0.864        |
| LAM                          | PEG        | 0.64        | 0.1 - 1.21          | 1.26         | 0.23 - 2.3           | 0.77         | 0.31 - 1.27         | 0.284        |
| LAM                          | PLA        | -0.81       | -1.76 - 0.09        | -1.21        | -2.18 - -0.26        | -1.01        | -1.65 - -0.34       | 0.55         |
| PEG                          | TDF        | -0.69       | -1.5 - 0.08         | -0.08        | -0.94 - 0.79         | -0.39        | -0.99 - 0.16        | 0.297        |
| <i>HBeAg sero-conversion</i> |            |             |                     |              |                      |              |                     |              |
| ADV                          | ETV        | -0.46       | -1.88 - 0.88        | 0.03         | -0.55 - 0.6          | -0.04        | -0.56 - 0.48        | 0.509        |
| ADV                          | LAM        | -0.64       | -1.69 - 0.4         | 0.15         | -0.41 - 0.72         | -0.03        | -0.52 - 0.48        | 0.194        |
| ADV                          | LDT        | 0.52        | -0.58 - 1.65        | 0.25         | -0.41 - 0.91         | 0.31         | -0.23 - 0.89        | 0.684        |
| ADV                          | PLA        | -0.84       | -1.76 - 0.06        | -1.29        | -2.28 - -0.36        | -1.02        | -1.7 - -0.39        | 0.484        |
| ADV                          | TDF        | 0.39        | -0.22 - 1.02        | -0.02        | -0.85 - 0.83         | 0.25         | -0.23 - 0.73        | 0.435        |
| ETV                          | LAM        | -0.01       | -0.39 - 0.41        | 0.12         | -0.71 - 0.9          | 0.01         | -0.33 - 0.37        | 0.784        |
| ETV                          | PLA        | -1.89       | -5.39 - 0.8         | -0.95        | -1.68 - -0.24        | -0.99        | -1.7 - -0.32        | 0.501        |
| ETV                          | TDF        | 0.29        | -0.39 - 1           | 0.27         | -0.43 - 1.01         | 0.28         | -0.19 - 0.78        | 0.947        |
| LAM                          | LDT        | 0.32        | -0.03 - 0.72        | 0.6          | -0.62 - 1.83         | 0.34         | 0.02 - 0.72         | 0.685        |
| LAM                          | PEG        | 0.69        | 0.14 - 1.25         | 1.22         | 0.21 - 2.23          | 0.8          | 0.35 - 1.3          | 0.346        |
| LAM                          | PLA        | -1.13       | -2.05 - -0.34       | -0.88        | -1.89 - 0.1          | -0.99        | -1.65 - -0.39       | 0.685        |
| PEG                          | TDF        | -0.8        | -1.67 - 0.03        | -0.28        | -1.08 - 0.51         | -0.53        | -1.1 - 0.01         | 0.35         |

Abbreviations: Virologic response, undetectable HBV DNA level; ALT norm, normalization of serum alanine aminotransferase; HBeAg sero, hepatitis B e antigen seroconversion; HBeAg loss, hepatitis B e antigen loss; HBsAg loss, hepatitis B surface antigen loss; OR : Odds Ratio, CI : Credible Interval ADV, adefovir; ETV, entecavir; LAM, lamivudine; PEG, pegylated interferon-alfa; PLA, placebo; TAF, tenofovir alafenamide; TBV, telbivudine; TDF, tenofovir disoproxil fumarate; ADVTBV, ETVPEG, ETVPEG1, ETVTDF, LAMADV, LAMADV1, LAMADV2, LAMTBV, LAMPEG, LAMPEG1, LAMPEG2, PEGADV, PEGADV1, PEGADV2, PEGADV3, PEGETV, TDFPEG1 and TDFPEG2 code for different combinations of antiviral agents with full details in Appendix C.
