# Supplementary material for: Antiviral treatment for treatment-naïve chronic hepatitis B: systematic review and network meta-analysis of randomized controlled trials
Source: PubMed Central journal article supplement (PMC6699129; doi:10.1186/s13643-019-1126-1), 2019-08-19
Supplement: 13643_2019_1126_MOESM6_ESM.pdf [file 13643_2019_1126_MOESM6_ESM.pdf]

**Appendix F: Relative effects on outcomes of all pairs of interventions in Odds Ratios (95% credible intervals) as calculated from the network meta-analyses using fixed effects models**

| Virologic Response: HBeAg-positive population in the left lower triangle & HBeAg-negative population in the right upper triangle |                         |                         |                          |                          |                         |                         |                         |                         |                         |                   |                            |                           |
|----------------------------------------------------------------------------------------------------------------------------------|-------------------------|-------------------------|--------------------------|--------------------------|-------------------------|-------------------------|-------------------------|-------------------------|-------------------------|-------------------|----------------------------|---------------------------|
| ADV                                                                                                                              |                         |                         | 1.83 (0.06, 20.24)       | 1.53 (0.04, 23.82)       | 0.38 (0.01, 4)          |                         |                         |                         | 1.34 (0.04, 14.84)      | 0.01 (0, 0.06)    | 11.01 (4.15, 28.96)        | 9.25 (5.61, 15.76)        |
| 0.43 (0.26, 0.68)                                                                                                                | ADV2                    |                         |                          |                          |                         |                         |                         |                         |                         |                   |                            |                           |
| 0.39 (0.18, 0.86)                                                                                                                | 0.92 (0.36, 2.31)       | ADVTBV                  |                          |                          |                         |                         |                         |                         |                         |                   |                            |                           |
| 0.15 (0.09, 0.25)                                                                                                                | 0.36 (0.18, 0.71)       | 0.39 (0.17, 0.87)       | ETV                      | 0.85 (0.23, 3.09)        | 0.21 (0.14, 0.3)        |                         |                         |                         | 0.73 (0.41, 1.3)        | 0.01 (0, 0.02)    | 6.1 (0.45, 211.59)         | 5.1 (0.43, 172.22)        |
| 0.08 (0.04, 0.18)                                                                                                                | 0.2 (0.08, 0.49)        | 0.22 (0.08, 0.59)       | 0.56 (0.31, 0.99)        | ETVDF                    | 0.24 (0.06, 0.96)       |                         |                         |                         | 0.86 (0.21, 3.68)       | 0.01 (0, 0.04)    | 7.32 (0.39, 307.99)        | 6.11 (0.38, 244.89)       |
| 0.43 (0.26, 0.74)                                                                                                                | 1.02 (0.5, 2.08)        | 1.12 (0.5, 2.48)        | 2.87 (2.28, 3.61)        | 5.12 (2.76, 9.57)        | LAM                     |                         |                         |                         | 3.55 (2.34, 5.41)       | 0.03 (0.01, 0.09) | 29.52 (2.29, 1013.11)      | 24.54 (2.19, 818.3)       |
| 0.2 (0.1, 0.4)                                                                                                                   | 0.47 (0.2, 1.11)        | 0.51 (0.21, 1.32)       | 1.33 (0.79, 2.21)        | 2.36 (1.09, 5.13)        | 0.46 (0.29, 0.73)       | LAMADV1                 |                         |                         |                         |                   |                            |                           |
| 0.25 (0.12, 0.51)                                                                                                                | 0.58 (0.24, 1.39)       | 0.63 (0.24, 1.64)       | 1.63 (0.92, 2.82)        | 2.89 (1.3, 6.46)         | 0.57 (0.34, 0.93)       | 1.23 (0.74, 2.03)       | LAMADV2                 |                         |                         |                   |                            |                           |
| 0.3 (0.11, 0.8)                                                                                                                  | 0.71 (0.24, 2.08)       | 0.77 (0.25, 2.41)       | 1.99 (0.85, 4.66)        | 3.55 (1.26, 9.88)        | 0.69 (0.31, 1.59)       | 1.5 (0.59, 3.89)        | 1.23 (0.47, 3.22)       | LAMTBV                  |                         |                   |                            |                           |
| 0.21 (0.12, 0.36)                                                                                                                | 0.49 (0.24, 1.01)       | 0.54 (0.24, 1.18)       | 1.38 (1, 1.88)           | 2.45 (1.28, 4.73)        | 0.48 (0.38, 0.6)        | 1.04 (0.63, 1.73)       | 0.85 (0.49, 1.48)       | 0.69 (0.31, 1.54)       | TBV                     | 0.01 (0, 0.03)    | 8.34 (0.62, 296.8)         | 6.98 (0.6, 235.54)        |
| 66.06 (11.69, 1836.09)                                                                                                           | 155.05 (27.71, 4296.41) | 172.34 (24.81, 5073.69) | 438.04 (70.47, 12724.24) | 801.05 (113.8, 22781.85) | 153.64 (24.45, 4417.57) | 335.63 (49.87, 9966.97) | 271.94 (40.04, 7927.08) | 225.07 (29.73, 6855.64) | 319.93 (50.92, 9248.77) | PLA               | 1058.56 (138.32, 32609.98) | 874.13 (140.77, 26039.89) |
| 0.08 (0.05, 0.13)                                                                                                                | 0.19 (0.09, 0.38)       | 0.2 (0.08, 0.5)         | 0.52 (0.31, 0.9)         | 0.94 (0.43, 2.07)        | 0.18 (0.1, 0.32)        | 0.39 (0.19, 0.83)       | 0.32 (0.15, 0.7)        | 0.26 (0.1, 0.71)        | 0.38 (0.21, 0.69)       | 0 (0, 0.01)       | TAF                        | 0.84 (0.38, 1.94)         |
| 0.07 (0.05, 0.11)                                                                                                                | 0.16 (0.09, 0.31)       | 0.18 (0.08, 0.42)       | 0.46 (0.29, 0.73)        | 0.82 (0.4, 1.7)          | 0.16 (0.1, 0.26)        | 0.35 (0.18, 0.69)       | 0.28 (0.14, 0.58)       | 0.23 (0.09, 0.6)        | 0.33 (0.2, 0.56)        | 0 (0, 0.01)       | 0.88 (0.65, 1.18)          | TDF                       |
| ALT Normalization: HBeAg-positive population in the left lower triangle & HBeAg-negative population in the right upper triangle  |                         |                         |                          |                          |                         |                         |                         |                         |                         |                   |                            |                           |
| ADV                                                                                                                              |                         |                         | 3.52 (1.07, 12.41)       | 3.01 (0.64, 14.38)       | 2.29 (0.72, 7.7)        |                         |                         |                         | 3.6 (1.08, 12.99)       | 0.15 (0.07, 0.3)  | 2.19 (1.24, 3.9)           | 1.03 (0.71, 1.5)          |

|                          |                           |                           |                            |                          |                           |                            |                           |                           |                           |                          |                            |                           |  |
|--------------------------|---------------------------|---------------------------|----------------------------|--------------------------|---------------------------|----------------------------|---------------------------|---------------------------|---------------------------|--------------------------|----------------------------|---------------------------|--|
| 0.79 (0.52, 1.21)        | <b>ADV2</b>               |                           |                            |                          |                           |                            |                           |                           |                           |                          |                            |                           |  |
| 0.66 (0.22, 1.75)        | 0.83 (0.26, 2.38)         | <b>ADVTBV</b>             |                            |                          |                           |                            |                           |                           |                           |                          |                            |                           |  |
| <b>0.53 (0.33, 0.85)</b> | 0.67 (0.37, 1.23)         | 0.81 (0.29, 2.44)         | <b>ETV</b>                 | 0.85 (0.32, 2.18)        | <b>0.65 (0.46, 0.91)</b>  |                            |                           |                           | 1.02 (0.6, 1.75)          | <b>0.04 (0.01, 0.11)</b> | 0.62 (0.16, 2.32)          | 0.29 (0.08, 1.03)         |  |
| 1.33 (0.64, 2.79)        | 1.68 (0.74, 3.88)         | 2.06 (0.64, 7.06)         | <b>2.49 (1.42, 4.48)</b>   | <b>ETVDF</b>             | 0.77 (0.28, 2.14)         |                            |                           |                           | 1.2 (0.41, 3.63)          | <b>0.05 (0.01, 0.2)</b>  | 0.74 (0.14, 3.85)          | 0.34 (0.07, 1.71)         |  |
| 0.89 (0.55, 1.45)        | 1.13 (0.62, 2.05)         | 1.36 (0.5, 4.05)          | <b>1.67 (1.3, 2.16)</b>    | 0.67 (0.35, 1.24)        | <b>LAM</b>                |                            |                           |                           | <b>1.57 (1.05, 2.38)</b>  | <b>0.07 (0.02, 0.16)</b> | 0.95 (0.25, 3.44)          | 0.45 (0.13, 1.52)         |  |
| <b>0.39 (0.2, 0.76)</b>  | 0.49 (0.23, 1.06)         | 0.6 (0.19, 1.98)          | 0.73 (0.43, 1.25)          | <b>0.29 (0.13, 0.64)</b> | <b>0.44 (0.27, 0.7)</b>   | <b>LAMADV1</b>             |                           |                           |                           |                          |                            |                           |  |
| <b>0.3 (0.14, 0.64)</b>  | 0.38 (0.16, 0.88)         | 0.46 (0.14, 1.6)          | 0.57 (0.3, 1.07)           | <b>0.23 (0.09, 0.53)</b> | <b>0.34 (0.19, 0.61)</b>  | 0.78 (0.41, 1.44)          | <b>LAMADV2</b>            |                           |                           |                          |                            |                           |  |
| 0.73 (0.24, 2.15)        | 0.92 (0.29, 2.86)         | 1.12 (0.27, 4.79)         | 1.37 (0.49, 3.76)          | 0.55 (0.17, 1.73)        | 0.82 (0.3, 2.17)          | 1.86 (0.62, 5.6)           | 2.41 (0.75, 7.57)         | <b>LAMTBV</b>             |                           |                          |                            |                           |  |
| <b>0.6 (0.35, 0.99)</b>  | 0.75 (0.4, 1.4)           | 0.91 (0.33, 2.73)         | 1.12 (0.8, 1.57)           | <b>0.45 (0.23, 0.86)</b> | <b>0.67 (0.53, 0.84)</b>  | 1.53 (0.91, 2.59)          | <b>1.97 (1.05, 3.77)</b>  | 0.82 (0.31, 2.21)         | <b>TBV</b>                | <b>0.04 (0.01, 0.11)</b> | 0.61 (0.15, 2.32)          | 0.29 (0.08, 1.02)         |  |
| <b>5.61 (3.57, 9.08)</b> | <b>7.08 (4.39, 11.93)</b> | <b>8.61 (2.94, 27.22)</b> | <b>10.53 (6.08, 18.52)</b> | <b>4.21 (1.88, 9.39)</b> | <b>6.29 (3.69, 10.98)</b> | <b>14.43 (7.02, 29.99)</b> | <b>18.65 (8.3, 41.97)</b> | <b>7.71 (2.55, 23.82)</b> | <b>9.42 (5.33, 17.08)</b> | <b>PLA</b>               | <b>14.58 (5.94, 36.84)</b> | <b>6.84 (3.15, 15.58)</b> |  |
| <b>0.47 (0.29, 0.78)</b> | 0.6 (0.31, 1.12)          | 0.72 (0.24, 2.3)          | 0.89 (0.53, 1.48)          | <b>0.35 (0.16, 0.76)</b> | <b>0.53 (0.31, 0.91)</b>  | 1.21 (0.59, 2.49)          | 1.56 (0.7, 3.52)          | 0.64 (0.21, 2)            | 0.79 (0.44, 1.42)         | <b>0.08 (0.04, 0.16)</b> | <b>TAF</b>                 | <b>0.47 (0.31, 0.72)</b>  |  |
| 0.68 (0.45, 1.02)        | 0.86 (0.48, 1.52)         | 1.03 (0.37, 3.19)         | 1.27 (0.83, 1.96)          | 0.51 (0.25, 1.03)        | 0.76 (0.48, 1.22)         | 1.74 (0.9, 3.39)           | <b>2.25 (1.06, 4.8)</b>   | 0.93 (0.32, 2.8)          | 1.14 (0.69, 1.9)          | <b>0.12 (0.07, 0.21)</b> | <b>1.44 (1.08, 1.93)</b>   | <b>TDF</b>                |  |

**HBeAg seroconversion in the left lower triangle & HBeAg loss in the right upper triangle**

|                   |                   |                   |                   |                   |                   |                   |                   |                   |                   |                          |                   |                   |
|-------------------|-------------------|-------------------|-------------------|-------------------|-------------------|-------------------|-------------------|-------------------|-------------------|--------------------------|-------------------|-------------------|
| <b>ADV</b>        | 1.17 (0.72, 1.9)  | 1.19 (0.48, 2.86) | 1.05 (0.6, 1.81)  | 0.69 (0.32, 1.47) | 0.99 (0.58, 1.71) | 0.99 (0.47, 2.1)  | 0.96 (0.42, 2.1)  | 0.54 (0.17, 1.62) | 1.38 (0.79, 2.44) | <b>0.38 (0.22, 0.64)</b> | 2.06 (0.99, 4.35) | 1.74 (0.96, 3.21) |
| 0.88 (0.47, 1.63) | <b>ADV2</b>       | 1.03 (0.37, 2.73) | 0.89 (0.45, 1.79) | 0.59 (0.25, 1.38) | 0.85 (0.43, 1.69) | 0.85 (0.36, 1.99) | 0.82 (0.33, 2)    | 0.46 (0.13, 1.49) | 1.18 (0.59, 2.38) | <b>0.33 (0.18, 0.57)</b> | 1.77 (0.75, 4.21) | 1.5 (0.71, 3.14)  |
| 0.88 (0.36, 2.19) | 1 (0.35, 2.94)    | <b>ADVTBV</b>     | 0.88 (0.36, 2.21) | 0.58 (0.21, 1.67) | 0.83 (0.35, 2.05) | 0.83 (0.3, 2.36)  | 0.8 (0.28, 2.34)  | 0.45 (0.12, 1.65) | 1.16 (0.49, 2.83) | <b>0.32 (0.12, 0.87)</b> | 1.74 (0.59, 5.19) | 1.46 (0.55, 4.03) |
| 1.07 (0.67, 1.72) | 1.21 (0.58, 2.55) | 1.21 (0.47, 3.01) | <b>ETV</b>        | 0.66 (0.4, 1.1)   | 0.95 (0.72, 1.25) | 0.95 (0.53, 1.69) | 0.92 (0.47, 1.73) | 0.52 (0.17, 1.41) | 1.32 (0.93, 1.89) | <b>0.37 (0.19, 0.67)</b> | 1.98 (1.01, 3.9)  | 1.66 (0.99, 2.81) |

|                   |                   |                    |                   |                   |                   |                    |                   |                   |                   |                   |                   |                    |                    |
|-------------------|-------------------|--------------------|-------------------|-------------------|-------------------|--------------------|-------------------|-------------------|-------------------|-------------------|-------------------|--------------------|--------------------|
| 1.88 (0.9, 3.92)  | 2.13 (0.84, 5.43) | 2.14 (0.72, 6.19)  | 1.75 (1.02, 3.06) | <b>ETVDF</b>      | 1.43 (0.8, 2.56)  | 1.43 (0.66, 3.1)   | 1.38 (0.6, 3.12)  | 0.77 (0.24, 2.42) | 1.99 (1.08, 3.75) | 0.55 (0.25, 1.23) | 2.99 (1.28, 7.01) | 2.52 (1.22, 5.23)  |                    |
| 1.11 (0.7, 1.78)  | 1.26 (0.61, 2.62) | 1.26 (0.5, 3.07)   | 1.04 (0.79, 1.37) | 0.59 (0.32, 1.1)  | <b>LAM</b>        | 1 (0.6, 1.66)      | 0.97 (0.53, 1.72) | 0.54 (0.19, 1.42) | 1.4 (1.11, 1.77)  | 0.39 (0.21, 0.7)  | 2.09 (1.03, 4.25) | 1.76 (0.99, 3.1)   |                    |
| 0.37 (0.17, 0.81) | 0.42 (0.15, 1.12) | 0.42 (0.13, 1.31)  | 0.35 (0.15, 0.77) | 0.2 (0.07, 0.53)  | 0.34 (0.15, 0.72) | <b>LAMADV</b>      |                   |                   |                   |                   |                   |                    |                    |
| 1.31 (0.63, 2.76) | 1.5 (0.59, 3.78)  | 1.49 (0.51, 4.26)  | 1.23 (0.65, 2.33) | 0.7 (0.3, 1.63)   | 1.18 (0.67, 2.11) | 3.53 (1.35, 9.46)  | <b>LAMADV1</b>    | 0.96 (0.53, 1.73) | 0.54 (0.17, 1.61) | 1.4 (0.8, 2.44)   | 0.39 (0.18, 0.84) | 2.09 (0.87, 5.03)  | 1.76 (0.82, 3.78)  |
| 1.48 (0.66, 3.44) | 1.69 (0.63, 4.64) | 1.69 (0.54, 5.14)  | 1.39 (0.67, 2.94) | 0.79 (0.31, 2.02) | 1.34 (0.68, 2.69) | 4 (1.44, 11.62)    | 1.13 (0.57, 2.3)  | <b>LAMADV2</b>    | 0.56 (0.17, 1.75) | 1.45 (0.78, 2.74) | 0.4 (0.17, 0.93)  | 2.16 (0.86, 5.47)  | 1.82 (0.82, 4.18)  |
| 2.14 (0.71, 7.17) | 2.45 (0.69, 9.31) | 2.43 (0.64, 10.03) | 2 (0.7, 6.46)     | 1.14 (0.35, 4.14) | 1.92 (0.71, 6.01) | 5.75 (1.62, 22.87) | 1.63 (0.51, 5.74) | 1.44 (0.42, 5.36) | <b>LAMTBV</b>     | 2.57 (1, 7.27)    | 0.72 (0.23, 2.35) | 3.87 (1.18, 13.66) | 3.25 (1.07, 10.66) |
| 0.8 (0.48, 1.33)  | 0.91 (0.43, 1.94) | 0.91 (0.37, 2.21)  | 0.75 (0.52, 1.09) | 0.43 (0.22, 0.83) | 0.72 (0.57, 0.93) | 2.16 (0.97, 4.92)  | 0.61 (0.33, 1.14) | 0.54 (0.26, 1.1)  | 0.38 (0.12, 1.01) | <b>TBV</b>        | 0.28 (0.15, 0.52) | 1.49 (0.72, 3.12)  | 1.26 (0.69, 2.31)  |
| 2.9 (1.58, 5.49)  | 3.3 (1.6, 7.08)   | 3.29 (1.16, 9.31)  | 2.72 (1.47, 5.21) | 1.55 (0.68, 3.68) | 2.61 (1.47, 4.85) | 7.83 (3.09, 20.6)  | 2.22 (0.98, 5.13) | 1.96 (0.79, 4.88) | 1.36 (0.38, 4.43) | 3.61 (1.95, 7.01) | <b>PLA</b>        | 5.42 (2.33, 12.56) | 4.56 (2.22, 9.49)  |
| 0.55 (0.28, 1.09) | 0.63 (0.25, 1.55) | 0.63 (0.21, 1.84)  | 0.52 (0.26, 1.04) | 0.3 (0.12, 0.72)  | 0.5 (0.24, 1.01)  | 1.49 (0.55, 4.12)  | 0.42 (0.17, 1.06) | 0.37 (0.14, 0.99) | 0.26 (0.07, 0.89) | 0.69 (0.32, 1.46) | 0.19 (0.08, 0.45) | <b>TAF</b>         | 0.84 (0.54, 1.29)  |
| 0.73 (0.46, 1.15) | 0.83 (0.39, 1.74) | 0.83 (0.31, 2.15)  | 0.68 (0.42, 1.1)  | 0.39 (0.19, 0.81) | 0.66 (0.39, 1.1)  | 1.97 (0.83, 4.75)  | 0.56 (0.26, 1.2)  | 0.49 (0.21, 1.15) | 0.34 (0.1, 1.06)  | 0.91 (0.52, 1.58) | 0.25 (0.12, 0.5)  | 1.31 (0.8, 2.21)   | <b>TDF</b>         |

**HBsAg loss for HBeAg-positive population**

|                 |                    |                     |                    |                    |                  |                    |                  |                       |                     |
|-----------------|--------------------|---------------------|--------------------|--------------------|------------------|--------------------|------------------|-----------------------|---------------------|
| <b>ADV</b>      | 2.9 (0.05, 271.54) | 3.85 (0.03, 640.68) | 1.85 (0.01, 329.3) | 1.69 (0, 1130.85)  | 1.8 (0, 1261.02) | 1.8 (0.01, 494.34) | 0.66 (0, 332.63) | 13.33 (0.19, 2314.97) | 4.41 (0.25, 178.38) |
| 0.34 (0, 22.06) | <b>ETV</b>         | 1.31 (0.11, 15.76)  | 0.63 (0.05, 7.79)  | 0.58 (0.01, 63.34) | 0.59 (0, 65.36)  | 0.61 (0.02, 15.05) | 0.23 (0, 15.45)  | 4.53 (0.07, 557.31)   | 1.58 (0.09, 30.77)  |

|                   |                     |                      |                    |                     |                     |                     |                   |                        |                      |
|-------------------|---------------------|----------------------|--------------------|---------------------|---------------------|---------------------|-------------------|------------------------|----------------------|
| 0.26 (0, 32.13)   | 0.76 (0.06, 9.37)   | ETVDF                | 0.48 (0.01, 17.23) | 0.43 (0, 89.87)     | 0.45 (0, 97.49)     | 0.47 (0.01, 26.73)  | 0.17 (0, 20.11)   | 3.47 (0.03, 718.78)    | 1.18 (0.03, 56.56)   |
| 0.54 (0, 77.74)   | 1.59 (0.13, 20.71)  | 2.1 (0.06, 75.21)    | LAM                | 0.93 (0.02, 49.96)  | 0.94 (0.02, 52.48)  | 0.98 (0.13, 7.42)   | 0.38 (0.01, 9.99) | 7.24 (0.06, 1694.37)   | 2.53 (0.05, 129.33)  |
| 0.59 (0, 325.27)  | 1.73 (0.02, 198.06) | 2.3 (0.01, 483.26)   | 1.08 (0.02, 61.42) | LAMADV1             | 1.03 (0.02, 61.82)  | 1.05 (0.01, 98.11)  | 0.39 (0, 76.6)    | 8.2 (0.01, 6590.4)     | 2.86 (0.01, 665.43)  |
| 0.56 (0, 323.9)   | 1.7 (0.02, 206.83)  | 2.23 (0.01, 498.84)  | 1.07 (0.02, 62.58) | 0.97 (0.02, 61.37)  | LAMADV2             | 1.01 (0.01, 94.99)  | 0.39 (0, 76.92)   | 7.85 (0.01, 6778.66)   | 2.7 (0.01, 693.81)   |
| 0.55 (0, 114.71)  | 1.64 (0.07, 44.14)  | 2.12 (0.04, 136.67)  | 1.02 (0.13, 7.72)  | 0.96 (0.01, 88.89)  | 0.99 (0.01, 84.19)  | TBV                 | 0.38 (0, 17.85)   | 7.4 (0.04, 2548.22)    | 2.61 (0.03, 211.32)  |
| 1.5 (0, 821.17)   | 4.35 (0.06, 468.91) | 5.75 (0.05, 1160.17) | 2.67 (0.1, 134.84) | 2.53 (0.01, 655.63) | 2.57 (0.01, 747.77) | 2.64 (0.06, 208.83) | PLA               | 20.47 (0.05, 15819.77) | 6.86 (0.04, 1758.07) |
| 0.08 (0, 5.39)    | 0.22 (0, 15.21)     | 0.29 (0, 39.2)       | 0.14 (0, 18.17)    | 0.12 (0, 67.34)     | 0.13 (0, 67.65)     | 0.14 (0, 27.08)     | 0.05 (0, 18.71)   | TAF                    | 0.37 (0.01, 7.23)    |
| 0.23 (0.01, 4.01) | 0.63 (0.03, 11.07)  | 0.84 (0.02, 35.92)   | 0.4 (0.01, 18.37)  | 0.35 (0, 89.03)     | 0.37 (0, 87.88)     | 0.38 (0, 29.05)     | 0.15 (0, 23.22)   | 2.67 (0.14, 127.9)     | TDF                  |

**Footnotes:** Treatments are reported in alphabetical order.

Empty cells in the right upper triangles are due to lack of studies comparing the treatment pairs in the virologic response and ALT normalization networks of the HBeAg-negative population; and the lack of studies comparing the treatment pairs in the HBeAg loss network.

Data are reported as an odds ratio (95% CI). Odd ratios higher than 1 favor the column-defining treatment.

Significant results are in red.

**Abbreviations:** HBeAg seroconversion, hepatitis B e antigen seroconversion; HBeAg loss, hepatitis B e antigen loss; HBsAg loss, hepatitis B surface antigen loss; ADV, adefovir 10mg daily; ADV2, adefovir 30mg daily; ETV, entecavir; LAM, lamivudine; TBV, telbivudine; PLA, placebo; TAF, tenofovir alafenamide; TDF, tenofovir disoproxil fumarate; ADVTBV, ETVTDF, LAMADV, LAMADV1, LAMADV2, and LAMTBV code for different combinations of antiviral agents with full details in Appendix C.
