# Supplementary material for: Antiviral treatment for treatment-naïve chronic hepatitis B: systematic review and network meta-analysis of randomized controlled trials
Source: Springer Nature journal article supplement (doi:10.1186/s13643-019-1126-1), 2019-08-19
Supplement: MOESM2 [file 17083004]

## Appendix B: Cochrane risk of bias assessment results

| Author, Year            | Random sequence generation | Allocation concealment | Blinding of participants and personnel | Blinding of outcome assessment | Complete-ness of outcome data | Free of selective reporting | Free of other bias |
|-------------------------|----------------------------|------------------------|----------------------------------------|--------------------------------|-------------------------------|-----------------------------|--------------------|
| Bozkaya et al. 2005     | ?                          | ?                      | ?                                      | ?                              | +                             | +                           | ?                  |
| Brouwer et al. 2015     | +                          | +                      | -                                      | +                              | +                             | +                           | +                  |
| Buti et al. 2016        | +                          | +                      | +                                      | ?                              | +                             | +                           | +                  |
| Cao et al. 2013         | ?                          | ?                      | ?                                      | +                              | +                             | +                           | +                  |
| Chan et al. 2007a       | +                          | +                      | ?                                      | +                              | +                             | +                           | +                  |
| Chan et al. 2007b       | +                          | +                      | +                                      | +                              | +                             | +                           | +                  |
| Chan et al. 2016        | +                          | +                      | +                                      | +                              | +                             | +                           | +                  |
| Chang et al. 2006       | ?                          | +                      | +                                      | +                              | +                             | +                           | +                  |
| Dienstag et al. 1999    | +                          | ?                      | +                                      | ?                              | +                             | +                           | +                  |
| Hadziyannis et al. 2003 | +                          | +                      | +                                      | +                              | +                             | +                           | +                  |
| He et al. 2012          | +                          | ?                      | ?                                      | +                              | +                             | +                           | +                  |
| Hou et al. 2015         | +                          | +                      | +                                      | +                              | +                             | +                           | +                  |
| Janssen et al. 2005     | +                          | +                      | +                                      | ?                              | +                             | +                           | +                  |
| Jia et al. 2014         | +                          | +                      | +                                      | +                              | +                             | +                           | +                  |
| Kaymakoglu et al. 2007  | +                          | ?                      | ?                                      | +                              | +                             | +                           | ?                  |
| Koike et al. 2017       | ?                          | +                      | +                                      | +                              | +                             | +                           | +                  |
| Lai et al. 1998         | +                          | +                      | +                                      | ?                              | +                             | +                           | +                  |
| Lai et al. 2005         | ?                          | +                      | +                                      | +                              | +                             | +                           | +                  |
| Lai et al. 2006         | ?                          | +                      | +                                      | ?                              | +                             | +                           | +                  |
| Lampetico et al. 2013   | +                          | +                      | ?                                      | ?                              | +                             | +                           | +                  |
| Lau et al. 2005         | +                          | +                      | +                                      | +                              | +                             | +                           | +                  |
| Lee et al. 2017         | +                          | +                      | +                                      | ?                              | +                             | +                           | +                  |

| Author, Year              | Random sequence generation | Allocation concealment | Blinding of participants and personnel | Blinding of outcome assessment | Complete-ness of outcome data | Free of selective reporting | Free of other bias |
|---------------------------|----------------------------|------------------------|----------------------------------------|--------------------------------|-------------------------------|-----------------------------|--------------------|
| Leung et al. 2009         | ?                          | ?                      | ?                                      | ?                              | +                             | +                           | +                  |
| Liang et al. 2015         | ?                          | ?                      | -                                      | ?                              | +                             | +                           | +                  |
| Liaw et al. 2009          | +                          | +                      | +                                      | +                              | +                             | +                           | +                  |
| Liu et al. 2014           | +                          | +                      | ?                                      | ?                              | +                             | +                           | +                  |
| Lok et al. 2012           | +                          | +                      | ?                                      | ?                              | +                             | +                           | +                  |
| Marcellin et al. 2003     | +                          | +                      | +                                      | +                              | +                             | +                           | +                  |
| Marcellin et al. 2004     | +                          | +                      | +                                      | +                              | +                             | +                           | +                  |
| Marcellin et al. 2008     | +                          | +                      | +                                      | ?                              | +                             | +                           | +                  |
| Marcellin et al. 2016     | +                          | +                      | -                                      | ?                              | +                             | +                           | +                  |
| Papadopoulos et al. 2009  | +                          | -                      | -                                      | ?                              | +                             | +                           | +                  |
| Piccolo et al. 2009       | +                          | +                      | +                                      | ?                              | +                             | +                           | +                  |
| Ren et al. 2007           | ?                          | ?                      | ?                                      | ?                              | +                             | +                           | +                  |
| Sriprayoon et al. 2017    | ?                          | ?                      | ?                                      | ?                              | +                             | +                           | +                  |
| Sung et al. 2008          | +                          | ?                      | +                                      | ?                              | +                             | +                           | +                  |
| Tangkijvanich et al. 2016 | +                          | ?                      | -                                      | ?                              | +                             | +                           | +                  |
| Tassopoulos et al. 1999   | +                          | ?                      | +                                      | ?                              | +                             | +                           | +                  |
| Tseng et al. 2014         | ?                          | ?                      | +                                      | ?                              | +                             | +                           | +                  |
| Xie et al. 2014           | +                          | +                      | -                                      | +                              | +                             | +                           | +                  |
| Yao et al. 2007           | ?                          | ?                      | +                                      | ?                              | +                             | +                           | +                  |
| Zhang et al. 2016         | +                          | ?                      | -                                      | ?                              | +                             | +                           | +                  |
