# Supplementary material for: Antiviral treatment for treatment-naïve chronic hepatitis B: systematic review and network meta-analysis of randomized controlled trials
Source: Springer Nature journal article supplement (doi:10.1186/s13643-019-1126-1), 2019-08-19
Supplement: MOESM3 [file 17083004]

## Appendix C: Characteristics of Included RCTs

| Author, Year, Design              | Treatment/<br>follow-up<br>Duration<br>(weeks) | Sample<br>size | Active Comparators                                                                                                                                               | Treatment<br>codes used in<br>network meta-<br>analysis | Outcomes reported                                     |
|-----------------------------------|------------------------------------------------|----------------|------------------------------------------------------------------------------------------------------------------------------------------------------------------|---------------------------------------------------------|-------------------------------------------------------|
| <b>HBeAg Positive</b>             |                                                |                |                                                                                                                                                                  |                                                         |                                                       |
| Brouwer et al. 2015<br>Open-label | 96                                             | 175            | 1. ETV 0.5mg daily<br>2. ETV 0.5mg daily + Peg-IFN add-on (180 mg/week) from week 24 to 48                                                                       | ETV<br>ETVPEG                                           | HBV DNA, ALT norm, HBeAg loss, HBeAg sero, HBsAg loss |
| Cao et al. 2013                   | 120                                            | 47             | 1. LAM 100mg daily + PEG IFN $\alpha$ -2a 135 mg weekly<br>2. ADV 10mg daily + PEG IFN $\alpha$ -2a 135 mg weekly                                                | LAMPEG2<br>PEGADV1                                      | HBV DNA, HBeAg sero, HBsAg loss                       |
| Chan et al. 2007a<br>Open-label   | 52                                             | 131            | 1. ADV 10mg daily<br>2. TBV 600mg daily<br>3. ADV 10mg daily for 24 weeks then switched to TBV 600mg daily                                                       | ADV<br>TBV<br>ADV/TBV                                   | HBV DNA, ALT norm, HBeAg loss, HBeAg sero, HBsAg loss |
| Chan et al. 2016<br>DB            | 48                                             | 873            | 1. TAF 25mg daily<br>2. TDF 300mg daily                                                                                                                          | TAF<br>TDF                                              | HBV DNA, ALT norm, HBeAg loss, HBeAg sero, HBsAg loss |
| Chang et al. 2006<br>DB           | 48                                             | 709            | 1. LAM 100mg daily<br>2. ETV 0.5mg daily                                                                                                                         | LAM<br>ETV                                              | HBV DNA, ALT norm, HBeAg loss, HBeAg sero, HBsAg loss |
| Dienstag et al. 1999<br>DB        | 68                                             | 137            | 1. PLA<br>2. LAM 100mg daily                                                                                                                                     | PLA<br>LAM                                              | HBeAg loss, HBeAg sero, HBsAg loss                    |
| He at al. 2012                    | 96                                             | 137            | 1. LAM 100mg daily<br>2. ADV 10mg daily<br>3. LAM 100 mg + ADV 10 mg daily for 12-24wks followed by ADV alone                                                    | LAM<br>ADV<br>LAMADV                                    | HBV DNA, ALT norm, HBeAg sero                         |
| Hou et al. 2015<br>DB             | 48                                             | 202            | 1. ADV 10mg daily<br>2. TDF 300mg daily                                                                                                                          | ADV<br>TDF                                              | HBV DNA, ALT norm, HBeAg loss, HBeAg sero, HBsAg loss |
| Janssen et al. 2005<br>DB         | 78                                             | 266            | 1. PEG $\alpha$ -2b 100 $\mu$ g weekly (50 $\mu$ g weekly from wk 32)<br>2. LAM 100mg daily + PEG $\alpha$ -2b 100 $\mu$ g weekly (50 $\mu$ g weekly from wk 32) | PEG<br>LAMPEG                                           | HBV DNA, ALT norm, HBeAg loss, HBeAg sero, HBsAg loss |
| Jia et al. 2014<br>DB             | 104                                            | 290            | 1. LAM 100mg daily<br>2. TBV 600mg daily                                                                                                                         | LAM<br>TBV                                              | HBV DNA, ALT norm, HBeAg loss, HBeAg sero, HBsAg loss |
| Koike et al. 2017<br>DB           | 48                                             | 165            | 1. TDF 300mg daily<br>2. ETV 0.5mg daily                                                                                                                         | TDF<br>ETV                                              | HBV DNA, ALT norm, HBeAg sero                         |
| Lai et al. 1998<br>DB             | 52                                             | 215            | 1. PLA<br>2. LAM 100mg daily                                                                                                                                     | PLA<br>LAM                                              | ALT norm, HBeAg sero, HBsAg loss                      |

| Author, Year, Design                | Treatment/<br>follow-up<br>Duration<br>(weeks) | Sample<br>size | Active Comparators                                                                                                                                                                                                                                          | Treatment<br>codes used in<br>network meta-<br>analysis | Outcomes reported                                     |
|-------------------------------------|------------------------------------------------|----------------|-------------------------------------------------------------------------------------------------------------------------------------------------------------------------------------------------------------------------------------------------------------|---------------------------------------------------------|-------------------------------------------------------|
| Lai et al. 2005<br>DB               | 52                                             | 104            | 1. LAM 100mg daily<br>2. TBV 400/600mg daily<br>3. LAM100mg + TBV 400/600mg daily                                                                                                                                                                           | LAM<br>TBV<br>LAMTBV                                    | HBV DNA, ALT norm, HBeAg loss, HBeAg sero, HBsAg loss |
| Lau et al. 2005<br>Partial DB       | 72                                             | 814            | 1. LAM 100mg daily<br>2. PEG $\alpha$ -2a 180 $\mu$ g weekly + PLA<br>3. LAM 100mg daily + PEG $\alpha$ -2a 180 $\mu$ g weekly                                                                                                                              | LAM<br>PEG<br>LAMPEG1                                   | HBV DNA, ALT norm, HBeAg loss, HBeAg sero             |
| Leung et al. 2009<br>Open-label     | 48                                             | 65             | 1. ADV 10mg daily<br>2. ETV 0.5mg daily                                                                                                                                                                                                                     | ADV<br>ETV                                              | HBV DNA, ALT norm, HBeAg loss, HBeAg sero             |
| Liang et al. 2015<br>Open-label     | 104                                            | 358            | 1. LAM 100 mg + ADV 10 mg daily<br>2. LAM 100 mg daily + add ADV 10 mg daily to suboptimal responders from wk 30<br>3. LAM 100 mg                                                                                                                           | LAMADV1<br>LAMADV2<br>LAM                               | HBV DNA, ALT norm, HBeAg loss, HBeAg sero, HBsAg loss |
| Liaw et al. 2009<br>DB              | 104                                            | 921            | 1. LAM 100mg daily<br>2. TBV 600mg daily                                                                                                                                                                                                                    | LAM<br>TBV                                              | HBV DNA, ALT norm, HBeAg loss, HBeAg sero, HBsAg loss |
| Liu et al. 2014<br>Open-label       | 52                                             | 61             | 1. PEG $\alpha$ -2b 1.5 $\mu$ g/kg weekly<br>2. PEG $\alpha$ -2b 1.5 $\mu$ g/kg weekly + ADV 10mg daily                                                                                                                                                     | PEG<br>PEGADV                                           | HBV DNA, ALT norm, HBsAg loss                         |
| Lok et al. 2012<br>Open-label       | 96                                             | 264            | 1. ETV 0.5mg daily<br>2. ETV 0.5mg daily + TDF 300mg daily                                                                                                                                                                                                  | ETV<br>ETVTDF                                           | HBV DNA, ALT norm, HBeAg loss, HBeAg sero, HBsAg loss |
| Marcellin et al. 2003<br>DB         | 48                                             | 511            | 1. PLA<br>2. ADV 10mg daily<br>3. ADV 30mg daily                                                                                                                                                                                                            | PLA<br>ADV<br>ADV2                                      | HBV DNA, ALT norm, HBeAg loss, HBeAg sero             |
| Marcellin et al. 2008<br>DB         | 48                                             | 266            | 1. ADV 10mg daily<br>2. TDF 300mg daily                                                                                                                                                                                                                     | ADV<br>TDF                                              | HBV DNA, ALT norm, HBeAg sero, HBsAg loss             |
| Marcellin et al. 2016<br>Open-label | 72                                             | 740            | 1. TDF 300mg daily + PEG $\alpha$ -2a 180 $\mu$ g weekly for 48 wks<br>2. TDF 300mg daily for 48 wks + PEG $\alpha$ -2a 180 $\mu$ g weekly for 1 <sup>st</sup> 16 wks<br>3. TDF 300mg daily for 72 wks<br>4. PEG $\alpha$ -2a 180 $\mu$ g weekly for 48 wks | TDFPEG1<br>TDFPEG2<br>TDF<br>PEG                        | HBV DNA, ALT norm, HBeAg loss, HBeAg sero, HBsAg loss |
| Ren et al. 2007                     | 48                                             | 42             | 1. LAM 100mg daily<br>2. ETV 0.5mg daily                                                                                                                                                                                                                    | LAM<br>ETV                                              | HBV DNA, ALT norm, HBeAg sero                         |
| Sriprayoon et al. 2017              | 144                                            | 400            | 1. ETV 0.5mg daily<br>2. TDF 300mg daily                                                                                                                                                                                                                    | ETV<br>TDF                                              | HBV DNA, ALT norm, HBeAg loss, HBeAg sero, HBsAg loss |
| Sung et al. 2008<br>DB              | 104                                            | 111            | 1. LAM 100mg daily<br>2. LAM 100 mg + ADV 10 mg daily                                                                                                                                                                                                       | LAM<br>LAMADV1                                          | HBV DNA, ALT norm, HBeAg loss, HBeAg sero             |
| Tseng et al. 2014                   | 52                                             | 42             | 1. ETV: 0.5mg daily                                                                                                                                                                                                                                         | ETV                                                     | HBeAg loss, HBeAg sero                                |

| Author, Year, Design            | Treatment/<br>follow-up<br>Duration<br>(weeks) | Sample<br>size | Active Comparators                                                                                                                                                                                                                                                                | Treatment<br>codes used in<br>network meta-<br>analysis | Outcomes reported                                     |
|---------------------------------|------------------------------------------------|----------------|-----------------------------------------------------------------------------------------------------------------------------------------------------------------------------------------------------------------------------------------------------------------------------------|---------------------------------------------------------|-------------------------------------------------------|
|                                 |                                                |                | 2. PLA                                                                                                                                                                                                                                                                            | PLA                                                     |                                                       |
| Xie et al. 2014<br>Open-label   | 72                                             | 218            | 1. PEG $\alpha$ -2a 180 $\mu$ g weekly for 48 wks<br>2. PEG $\alpha$ -2a 180 $\mu$ g weekly for 48 wks + ETV add-on at week 13 for 24 weeks<br>3. ETV 0.5mg daily for 24 wks + PEG $\alpha$ -2a from week 21 for 48 wks                                                           | PEG<br>PEGETV<br>ETVPEG1                                | HBV DNA, ALT norm, HBeAg loss, HBeAg sero, HBsAg loss |
| Yao et al. 2007<br>DB           | 48                                             | 446            | 1. LAM 100mg daily<br>2. ETV 0.5mg daily                                                                                                                                                                                                                                          | LAM<br>ETV                                              | HBV DNA, ALT norm, HBeAg loss, HBeAg sero             |
| Zhang et al. 2016<br>Open-label | 96                                             | 129            | 1. PEG $\alpha$ -2a 135 $\mu$ g weekly for 48 wks<br>2. PEG $\alpha$ -2a 135 $\mu$ g weekly + ADV 10mg daily add-on at wk 0<br>3. PEG $\alpha$ -2a 135 $\mu$ g weekly + ADV 10mg daily add-on at wk 12<br>4. PEG $\alpha$ -2a 135 $\mu$ g weekly + ADV 10mg daily add-on at wk 24 | PEG<br>PEGADV1<br>PEGADV2<br>PEGADV3                    | HBV DNA, ALT norm, HBeAg sero, HBsAg loss             |

### HBeAg Negative

|                                      |     |     |                                                                                                          |                |                   |
|--------------------------------------|-----|-----|----------------------------------------------------------------------------------------------------------|----------------|-------------------|
| Bozkaya et al. 2005                  | 52  | 55  | 1. No treatment<br>2. LAM 100mg daily                                                                    | PLA<br>LAM     | ALT norm          |
| Buti et al. 2016<br>DB               | 48  | 425 | 1. TAF 25mg daily<br>2. TDF 300mg daily                                                                  | TAF<br>TDF     | HBV DNA, ALT norm |
| Chan et al. 2007b<br>DB              | 120 | 136 | 1. PLA<br>2. LAM 100mg daily                                                                             | PLA<br>LAM     | HBV DNA, ALT norm |
| Hadziyannis et al. 2003<br>DB        | 48  | 184 | 1. PLA<br>2. ADV 10mg daily                                                                              | PLA<br>ADV     | HBV DNA, ALT norm |
| Hou et al. 2015<br>DB                | 48  | 307 | 1. ADV 10mg daily<br>2. TDF 300mg daily                                                                  | ADV<br>TDF     | HBV DNA, ALT norm |
| Jia et al. 2014<br>DB                | 104 | 42  | 1. LAM 100mg daily<br>2. TBV 600mg daily                                                                 | LAM<br>TBV     | HBV DNA, ALT norm |
| Kaymakoglu et al. 2007<br>Open-label | 72  | 48  | 1. PEG $\alpha$ -2b 1.5 $\mu$ g/kg weekly<br>2. LAM 100mg daily + PEG $\alpha$ -2b 1.5 $\mu$ g/kg weekly | PEG<br>LAMPEG1 | HBV DNA, ALT norm |
| Lai et al. 2006<br>DB                | 48  | 638 | 1. LAM 100mg daily<br>2. ETV 0.5mg daily                                                                 | LAM<br>ETV     | HBV DNA, ALT norm |

| Author, Year, Design                    | Treatment/<br>follow-up<br>Duration<br>(weeks) | Sample<br>size | Active Comparators                                                                                                                                                                                                                                        | Treatment<br>codes used in<br>network meta-<br>analysis | Outcomes reported |
|-----------------------------------------|------------------------------------------------|----------------|-----------------------------------------------------------------------------------------------------------------------------------------------------------------------------------------------------------------------------------------------------------|---------------------------------------------------------|-------------------|
| Lampetico et al. 2013<br>Open-label     | 96                                             | 128            | 1. PEG $\alpha$ -2a 180 $\mu$ g weekly for 48 wks<br>2. PEG $\alpha$ -2a 180 $\mu$ g weekly for 48 wks then<br>135 $\mu$ g weekly for 48 wks<br>3. (LAM 100mg + PEG $\alpha$ -2a 180 $\mu$ g weekly) for<br>48 wks then PEG 135 $\mu$ g weekly for 48 wks | PEG<br>PEGPEG<br>LAMPEG                                 | HBV DNA, ALT norm |
| Lee et al. 2017<br>Partial DB           | 240                                            | 120            | 1. ETV 0.5mg daily<br>2. LAM 100mg daily                                                                                                                                                                                                                  | ETV<br>LAM                                              | HBV DNA           |
| Liaw et al. 2009<br>DB                  | 104                                            | 446            | 1. LAM 100mg daily<br>2. TBV 600mg daily                                                                                                                                                                                                                  | LAM<br>TBV                                              | HBV DNA, ALT norm |
| Lok et al. 2012<br>Open-label           | 96                                             | 115            | 1. ETV: 0.5mg daily<br>2. ETV 0.5mg daily + TDF 300mg daily                                                                                                                                                                                               | ETV<br>ETVTDF                                           | HBV DNA, ALT norm |
| Marcellin et al. 2004<br>Partial DB     | 72                                             | 537            | 1. LAM 100mg daily<br>2. PEG $\alpha$ -2a 180 $\mu$ g weekly<br>3. LAM 100mg daily + PEG $\alpha$ -2a 180 $\mu$ g weekly                                                                                                                                  | LAM<br>PEG<br>LAMPEG1                                   | HBV DNA, ALT norm |
| Marcellin et al. 2008<br>DB             | 48                                             | 375            | 1. ADV 10mg daily<br>2. TDF 300mg daily                                                                                                                                                                                                                   | ADV<br>TDF                                              | HBV DNA, ALT norm |
| Papadopoulos et al.<br>2009             | 72                                             | 123            | 1. PEG $\alpha$ -2b 1.5 $\mu$ g/kg weekly<br>2. LAM 100mg daily + PEG $\alpha$ -2b 1.5 $\mu$ g/kg<br>weekly                                                                                                                                               | PEG<br>LAMPEG1                                          | HBV DNA, ALT norm |
| Piccolo et al. 2009<br>DB               | 72                                             | 60             | 1. PEG $\alpha$ -2a 1.5 $\mu$ g/kg weekly<br>2. PEG $\alpha$ -2a 1.5 $\mu$ g/kg weekly + ADV 10mg/day                                                                                                                                                     | PEG<br>PEGADV                                           | HBV DNA, ALT norm |
| Tangkijvanich et al. 2016<br>Open-label | 96                                             | 126            | 1. PEG $\alpha$ -2b 1.5 $\mu$ g/kg weekly<br>2. ETV 0.5mg daily + PEG $\alpha$ -2b 1.5 $\mu$ g/kg weekly                                                                                                                                                  | PEG<br>PEGETV                                           | HBV DNA, ALT norm |
| Tassopoulos et al. 1999<br>DB           | 52                                             | 108            | 1. PLA<br>2. LAM 100mg daily                                                                                                                                                                                                                              | PLA<br>LAM                                              | HBV DNA, ALT norm |
| Yao et al. 2007<br>DB                   | 48                                             | 73             | 1. LAM 100mg daily<br>2. ETV 0.5mg daily                                                                                                                                                                                                                  | LAM<br>ETV                                              | HBV DNA, ALT norm |

Abbreviations: DB, double-blind; ADV, adefovir; ETV, entecavir; LAM, lamivudine; PEG, pegylated interferon; PLA, placebo; TAF, tenofovir alafenamide; TBV, telbivudine; TDF, tenofovir disoproxil fumarate; HBV DNA, undetectable HBV DNA levels; ALT norm, normalization of serum alanine aminotransferase levels; HBeAg sero, hepatitis B e antigen seroconversion; HBeAg loss, hepatitis B e antigen loss; HBsAg loss, hepatitis B surface antigen loss
