# Supplementary material for: Antiviral treatment for treatment-naïve chronic hepatitis B: systematic review and network meta-analysis of randomized controlled trials
Source: Springer Nature journal article supplement (doi:10.1186/s13643-019-1126-1), 2019-08-19
Supplement: MOESM4 [file 17083004]

## Appendix D: Participant Baseline Characteristics of included RCTs

| Author, Year, Design              | Mean Age $\pm$ SD/<br>Median Age (Range)           | Male (%)       | Active Comparator                                                                                                                                                                                                                                                                | Baseline HBV DNA                                                                                       | Baseline ALT                                                               |
|-----------------------------------|----------------------------------------------------|----------------|----------------------------------------------------------------------------------------------------------------------------------------------------------------------------------------------------------------------------------------------------------------------------------|--------------------------------------------------------------------------------------------------------|----------------------------------------------------------------------------|
| <b>HBeAg Positive</b>             |                                                    |                |                                                                                                                                                                                                                                                                                  |                                                                                                        |                                                                            |
| Brouwer et al. 2015<br>Open-label | 31 $\pm$ 9<br>32 $\pm$ 10                          | 69<br>74       | <ul style="list-style-type: none"> <li>ETV 0.5mg daily</li> <li>ETV 0.5mg daily + Peg-IFN add-on (180 mg/week) from week 24 to 48</li> </ul>                                                                                                                                     | 7.8 $\pm$ 1.1<br>7.8 $\pm$ 1.3<br>(logIU/ml, mean $\pm$ SD)                                            | 2.7 $\pm$ 2.1<br>3.1 $\pm$ 3.3<br>(mean $\pm$ SD)                          |
| Cao et al. 2013                   | 32.3 $\pm$ 12<br>35.7 $\pm$ 9.4                    | 71<br>74       | <ul style="list-style-type: none"> <li>LAM 100mg daily + PEG IFN<math>\alpha</math>-2a 135 mg weekly</li> <li>ADV 10mg daily + PEG IFN<math>\alpha</math>-2a 135 mg weekly</li> </ul>                                                                                            | 7.3 $\pm$ 1.1<br>7.1 $\pm$ 1.1<br>(log copies/mL, mean $\pm$ SD)                                       | 144.2 $\pm$ 64.5<br>149.8 $\pm$ 62.7<br>(U/L, mean $\pm$ SD)               |
| Chan et al. 2007a<br>Open-label   | 30 (19-47)<br>34 (18-60)<br>33 (18-53)             | 91<br>78<br>59 | <ul style="list-style-type: none"> <li>ADV 10mg daily</li> <li>TBV 600mg daily</li> <li>ADV 10mg daily for 24 weeks then switched to TBV 600mg daily</li> </ul>                                                                                                                  | 9.98 $\pm$ 0.23<br>9.57 $\pm$ 0.26<br>9.47 $\pm$ 0.29<br>(log <sub>10</sub> copies/mL , mean $\pm$ SE) | 199 $\pm$ 25.7<br>183 $\pm$ 23.6<br>138 $\pm$ 12.8<br>(U/L, mean $\pm$ SE) |
| Chan et al. 2016<br>DB            | 38 $\pm$ 11<br>38 $\pm$ 12                         | 64<br>65       | <ul style="list-style-type: none"> <li>TAF 25mg daily</li> <li>TDF 300mg daily</li> </ul>                                                                                                                                                                                        | 7.6 $\pm$ 1.34<br>7.6 $\pm$ 1.41<br>(log <sub>10</sub> IU/ml, mean $\pm$ SD)                           | 117 $\pm$ 105.1<br>125 $\pm$ 128.2<br>(U/L, mean $\pm$ SD)                 |
| Chang et al. 2006<br>DB           | 35 $\pm$ 13<br>35 $\pm$ 13                         | 74<br>77       | <ul style="list-style-type: none"> <li>LAM 100mg daily</li> <li>ETV 0.5mg daily</li> </ul>                                                                                                                                                                                       | 9.69 $\pm$ 1.99<br>9.62 $\pm$ 2.01<br>(log copies/ml, mean $\pm$ SD)                                   | 146.3 $\pm$ 123.3<br>140.5 $\pm$ 114.3<br>(U/L, mean $\pm$ SD)             |
| Dienstag et al. 1999<br>DB        | 38(20-67)<br>40(18-73)                             | 80<br>86       | <ul style="list-style-type: none"> <li>PLA</li> <li>LAM 100mg daily</li> </ul>                                                                                                                                                                                                   | 56.5 (0.8-653)<br>102.2 (0.8-1753)<br>pg/ml, median (range)                                            | 135 (33-592)<br>125 (46-401)<br>U/L, median (range)                        |
| He at al. 2012                    | 38.9 $\pm$ 6.7<br>38.6 $\pm$ 6.6<br>39.6 $\pm$ 7.2 | 72<br>70<br>76 | <ul style="list-style-type: none"> <li>LAM 100mg daily</li> <li>ADV 10mg daily</li> <li>LAM 100 mg + ADV 10 mg daily for 12-24wks followed by ADV alone</li> </ul>                                                                                                               | 8.2 $\pm$ 0.9<br>8.1 $\pm$ 0.7<br>8.3 $\pm$ 0.8<br>(log <sub>10</sub> copies/ml, mean $\pm$ SD)        | 4.5 $\pm$ 2.1<br>5.3 $\pm$ 2.2<br>5.2 $\pm$ 2.2<br>(xULN, mean $\pm$ SD)   |
| Hou et al. 2015<br>DB             | 36.4(18-66)<br>36.1(18-66)                         | 83.3<br>83.3   | <ul style="list-style-type: none"> <li>ADV 10mg daily</li> <li>TDF 300mg daily</li> </ul>                                                                                                                                                                                        | 8.7 $\pm$ 0.79<br>8.7 $\pm$ 0.87<br>(log <sub>10</sub> copies/ml, mean $\pm$ SD)                       | 189 $\pm$ 121.5<br>199.1 $\pm$ 132.8<br>(U/L, mean $\pm$ SD)               |
| Janssen et al. 2005<br>DB         | 36 $\pm$ 14<br>34 $\pm$ 12                         | 79<br>75       | <ul style="list-style-type: none"> <li>PEG<math>\alpha</math>-2b 100<math>\mu</math>g weekly (reduced to 50<math>\mu</math>g from wk 32)</li> <li>LAM 100mg daily + PEG<math>\alpha</math>-2b 100<math>\mu</math>g weekly (reduced to 50<math>\mu</math>g from wk 32)</li> </ul> | 9.1 $\pm$ 0.8<br>9.1 $\pm$ 1<br>(log copies/ml, mean $\pm$ SD)                                         | 4.3 $\pm$ 3.1<br>4.4 $\pm$ 3.9<br>(xULN, mean $\pm$ SD)                    |
| Jia et al. 2014<br>DB             | 29.9 (15-63)<br>29.3 (16-64)                       | 76.4<br>80.8   | <ul style="list-style-type: none"> <li>LAM 100mg daily</li> <li>TBV 600mg daily</li> </ul>                                                                                                                                                                                       | 9.4 $\pm$ 0.14<br>9.2 $\pm$ 0.12<br>(log <sub>10</sub> copies/ml, mean $\pm$ SE)                       | 159.3 $\pm$ 14.72<br>157 $\pm$ 8.92<br>(IU/L, mean $\pm$ SE)               |

| Author, Year, Design            | Mean Age $\pm$ SD/<br>Median Age (Range) | Male (%)             | Active Comparator                                                                                                                                                                                                       | Baseline HBV DNA                                                                                  | Baseline ALT                                                                       |
|---------------------------------|------------------------------------------|----------------------|-------------------------------------------------------------------------------------------------------------------------------------------------------------------------------------------------------------------------|---------------------------------------------------------------------------------------------------|------------------------------------------------------------------------------------|
| Koike et al. 2017<br>DB         | 45 (22-69)<br>46.5 (30-67)               | 62<br>71             | <ul style="list-style-type: none"> <li>TDF 300mg daily</li> <li>ETV 0.5mg daily</li> </ul>                                                                                                                              | 7 $\pm$ 1.5<br>7.19 $\pm$ 1.3<br>(log <sub>10</sub> copies/ml, mean $\pm$ SD)                     | 90.4 $\pm$ 99.1<br>76.7 $\pm$ 80.7<br>(IU/L, mean $\pm$ SD)                        |
| Lai et al. 1998<br>DB           | 29 (15-67)<br>31 (16-55)                 | 72<br>74             | <ul style="list-style-type: none"> <li>PLA</li> <li>LAM 100mg daily</li> </ul>                                                                                                                                          | 99.4 (1-990)<br>74.2 (1-516)<br>pg/ml, median (range)                                             | 1.5 (0-10)<br>1.5 (0-15)<br>xULN, meaian (range)                                   |
| Lai et al. 2005<br>DB           | 34 (18-61)<br>41 (19-68)<br>32 (19-53)   | 74<br>79.5<br>85     | <ul style="list-style-type: none"> <li>LAM 100mg daily</li> <li>TBV 400/600mg daily</li> <li>LAM100mg + TBV 400/600mg daily</li> </ul>                                                                                  | 9.3 (6.6-12.9)<br>9.0 (6.3-13.3)<br>9.5 (5.9-13.2)<br>log <sub>10</sub> copies/ml, median (range) | 122 (62-309)<br>130 (35-400)<br>142 (32-1657)<br>U/L, median (range)               |
| Lau et al. 2005<br>Partial DB   | 30 (17-65)<br>31 (18-77)<br>29 (18-66)   | 79<br>79<br>77       | <ul style="list-style-type: none"> <li>LAM 100mg daily</li> <li>PEG<math>\alpha</math>-2a 180<math>\mu</math>g weekly + PLA</li> <li>LAM 100mg daily + PEG<math>\alpha</math>-2a 180<math>\mu</math>g weekly</li> </ul> | 10.1 $\pm$ 2.0<br>9.9 $\pm$ 2.1<br>10.1 $\pm$ 1.9<br>(log copies/ml, mean $\pm$ SD)               | 102.3 $\pm$ 78.4<br>114.6 $\pm$ 114.3<br>114.9 $\pm$ 94.1<br>(IU/L, mean $\pm$ SD) |
| Leung et al. 2009<br>Open-label | 32 $\pm$ 2<br>37 $\pm$ 2.4               | 66<br>61             | <ul style="list-style-type: none"> <li>ADV 10mg daily</li> <li>ETV 0.5mg daily</li> </ul>                                                                                                                               | 9.88 $\pm$ 0.22<br>10.26 $\pm$ 0.35<br>(log <sub>10</sub> copies/ml, mean $\pm$ SE)               | 172.3 $\pm$ 37<br>110.6 $\pm$ 14.6<br>(U/L, mean $\pm$ SE)                         |
| Liang et al. 2015<br>Open-label | 30(18-58)<br>28(18-59)<br>31(18-63)      | 78.3<br>77.5<br>75.4 | <ul style="list-style-type: none"> <li>LAM 100 mg + ADV 10 mg daily</li> <li>LAM 100 mg daily + ADV 10 mg daily to suboptimal responders from wk 30</li> <li>LAM 100 mg</li> </ul>                                      | 8.6 $\pm$ 0.9<br>8.6 $\pm$ 0.9<br>8.6 $\pm$ 0.9<br>(log <sub>10</sub> copies/ml, mean $\pm$ SD)   | 3.3 $\pm$ 2.7<br>3.4 $\pm$ 2.1<br>3.6 $\pm$ 2.8<br>(xULN, mean $\pm$ SD)           |
| Liaw et al. 2009<br>DB          | 33 (16-67)<br>32 (16-63)                 | 76<br>73             | <ul style="list-style-type: none"> <li>LAM 100mg daily</li> <li>TBV 600mg daily</li> </ul>                                                                                                                              | 9.5 $\pm$ 0.1<br>9.5 $\pm$ 0.1<br>(log <sub>10</sub> copies/ml, mean $\pm$ SE)                    | 158.9 $\pm$ 6.3<br>146.4 $\pm$ 5.37<br>(IU/L, mean $\pm$ SE)                       |
| Liu et al. 2014<br>Open-label   | 24 (16-39)<br>27 (21-44)                 | 68<br>63             | <ul style="list-style-type: none"> <li>PEG<math>\alpha</math>-2b 1.5<math>\mu</math>g/kg weekly</li> <li>ADV 10mg daily + PEG<math>\alpha</math>-2b 1.5<math>\mu</math>g/kg weekly</li> </ul>                           | 7.51 (6.13-8.88)<br>7.37 (5.61-8.01)<br>log U/ml, median (range)                                  | 4.1 (2.33-9.95)<br>3.83 (1.78-9.25)<br>xULN, median (range)                        |
| Lok et al. 2012<br>Open-label   | 40 $\pm$ 1.1<br>39 $\pm$ 1               | 63.7<br>74.1         | <ul style="list-style-type: none"> <li>ETV 0.5mg daily</li> <li>ETV 0.5mg daily + TDF 300mg daily</li> </ul>                                                                                                            | 8.1 $\pm$ 0.09<br>8.15 $\pm$ 0.08<br>(log <sub>10</sub> IU/ml, mean $\pm$ SE)                     | 127 $\pm$ 7.3<br>158 $\pm$ 13.1<br>(U/L, mean $\pm$ SE)                            |
| Marcellin et al. 2003<br>DB     | 35 (16-66)<br>32 (16-65)<br>32 (17-68)   | 71<br>76<br>75       | <ul style="list-style-type: none"> <li>PLA</li> <li>ADV 10mg daily</li> <li>ADV 30mg daily</li> </ul>                                                                                                                   | 8.12 $\pm$ 0.89<br>8.25 $\pm$ 0.90<br>8.22 $\pm$ 0.84<br>(log copies/ml, mean $\pm$ SD)           | 139 $\pm$ 131<br>139 $\pm$ 154<br>124 $\pm$ 96<br>(U/L, mean $\pm$ SD)             |
| Marcellin et al. 2008<br>DB     | 34 $\pm$ 12<br>34 $\pm$ 11               | 71<br>68             | <ul style="list-style-type: none"> <li>ADV 10mg daily</li> <li>TDF 300mg daily</li> </ul>                                                                                                                               | 8.88 $\pm$ 0.93<br>8.64 $\pm$ 1.076<br>(log <sub>10</sub> copies/ml, mean $\pm$ SD)               | 155 $\pm$ 121.49<br>142 $\pm$ 102.81<br>(IU/L, mean $\pm$ SD)                      |

| Author, Year, Design                | Mean Age $\pm$ SD/<br>Median Age (Range)                                    | Male (%)                   | Active Comparator                                                                                                                                                                                                                                                                                                                                                                                                     | Baseline HBV DNA                                                                                             | Baseline ALT                                                                              |
|-------------------------------------|-----------------------------------------------------------------------------|----------------------------|-----------------------------------------------------------------------------------------------------------------------------------------------------------------------------------------------------------------------------------------------------------------------------------------------------------------------------------------------------------------------------------------------------------------------|--------------------------------------------------------------------------------------------------------------|-------------------------------------------------------------------------------------------|
| Marcellin et al. 2016<br>Open-label | 38 $\pm$ 16.7<br>37 $\pm$ 9<br>36 $\pm$ 10.9<br>38 $\pm$ 10.5               | 68<br>65<br>65<br>64       | <ul style="list-style-type: none"> <li>TDF 300mg daily + PEG <math>\alpha</math>-2a 180<math>\mu</math>g weekly for 48 wks</li> <li>TDF 300mg daily + PEG <math>\alpha</math>-2a 180<math>\mu</math>g weekly for 16 wks followed by TDF only for 32 wks</li> <li>TDF 300mg daily</li> <li>PEG <math>\alpha</math>-2a 180<math>\mu</math>g weekly for 48 wks</li> </ul>                                                | 7.1 $\pm$ 1.5<br>7.1 $\pm$ 1.5<br>7.0 $\pm$ 1.5<br>6.9 $\pm$ 1.6<br>(log <sub>10</sub> IU/ml, mean $\pm$ SD) | 121 $\pm$ 181<br>112 $\pm$ 94<br>101 $\pm$ 68<br>107 $\pm$ 92<br>(U/L, mean $\pm$ SD)     |
| Ren et al. 2007                     | 31 $\pm$ 12<br>33 $\pm$ 10                                                  | 52<br>57                   | <ul style="list-style-type: none"> <li>LAM 100mg daily</li> <li>ETV 0.5mg daily</li> </ul>                                                                                                                                                                                                                                                                                                                            | 8.49 $\pm$ 1.10<br>8.52 $\pm$ 1.02<br>(log copies/ml, mean $\pm$ SD)                                         | 201.6 $\pm$ 178.2<br>211.2 $\pm$ 144.7<br>(IU/L, mean $\pm$ SD)                           |
| Sriprayoon et al. 2017              | 41.6 $\pm$ 11.5<br>41.2 $\pm$ 11.6                                          | 60.5<br>56.5               | <ul style="list-style-type: none"> <li>ETV 0.5mg daily</li> <li>TDF 300mg daily</li> </ul>                                                                                                                                                                                                                                                                                                                            | 7.1 $\pm$ 1.5<br>7.0 $\pm$ 1.3<br>(log <sub>10</sub> IU/ml, mean $\pm$ SD)                                   | 68.1 $\pm$ 64.1<br>76.8 $\pm$ 79.8<br>(U/L, mean $\pm$ SD)                                |
| Sung et al. 2008<br>DB              | 36 (18-79)<br>33 (17-63)                                                    | 74<br>83                   | <ul style="list-style-type: none"> <li>LAM 100mg daily</li> <li>LAM 100 mg + ADV 10 mg daily</li> </ul>                                                                                                                                                                                                                                                                                                               | 9.17 (4.4-11.1)<br>8.87 (6.5-11.0)<br>log <sub>10</sub> copies/ml, median (range)                            | -                                                                                         |
| Tseng et al. 2014                   | 45 $\pm$ 10<br>42 $\pm$ 12                                                  | 59<br>55                   | <ul style="list-style-type: none"> <li>ETV: 0.5mg daily</li> <li>PLA</li> </ul>                                                                                                                                                                                                                                                                                                                                       | 5.95 $\pm$ 1.3<br>6.31 $\pm$ 1.42<br>(log copies/ml, mean $\pm$ SD)                                          | 0.6 $\pm$ 0.2<br>0.6 $\pm$ 0.2<br>(xULN, mean $\pm$ SD)                                   |
| Xie et al. 2014<br>Open-label       | 29.5 $\pm$ 8.1<br>29.2 $\pm$ 6.9<br>30 $\pm$ 8.4                            | 77.8<br>78.1<br>82.2       | <ul style="list-style-type: none"> <li>PEG <math>\alpha</math>-2a 180<math>\mu</math>g weekly for 48 wks</li> <li>PEG <math>\alpha</math>-2a 180<math>\mu</math>g weekly for 48 wks + 24 weeks of ETV add-on at week 13</li> <li>ETV 0.5mg daily for 24 wks + PEG <math>\alpha</math>-2a at week 21 for 48 wks</li> </ul>                                                                                             | 7.1 $\pm$ 0.8<br>7.1 $\pm$ 1.2<br>7.1 $\pm$ 1.1<br>(log copies/ml, mean $\pm$ SD)                            | 4.1 $\pm$ 2.5<br>3.8 $\pm$ 2.1<br>4.3 $\pm$ 3.4<br>(xULN, mean $\pm$ SD)                  |
| Yao et al. 2007<br>DB               | 30 $\pm$ 9<br>30 $\pm$ 9                                                    | 83<br>82                   | <ul style="list-style-type: none"> <li>LAM 100mg daily</li> <li>ETV 0.5mg daily</li> </ul>                                                                                                                                                                                                                                                                                                                            | 8.65 $\pm$ 1<br>8.77 $\pm$ 0.86<br>(log copies/ml, mean $\pm$ SD)                                            | 204 $\pm$ 192<br>191 $\pm$ 135<br>(U/L, mean $\pm$ SD)                                    |
| Zhang et al. 2016<br>Open-label     | 28.56 $\pm$ 7.95<br>30.15 $\pm$ 7.19<br>29.5 $\pm$ 8.08<br>29.28 $\pm$ 6.94 | 78.1<br>78.8<br>75<br>81.3 | <ul style="list-style-type: none"> <li>PEG<math>\alpha</math>-2a 135 <math>\mu</math>g weekly for 48 wks</li> <li>PEG<math>\alpha</math>-2a 135 <math>\mu</math>g weekly + ADV 10mg daily add-on at wk 0</li> <li>PEG<math>\alpha</math>-2a 135 <math>\mu</math>g weekly + ADV 10mg daily add-on at wk 12</li> <li>PEG<math>\alpha</math>-2a 135 <math>\mu</math>g weekly + ADV 10mg daily add-on at wk 24</li> </ul> | 7.15 $\pm$ 1.14<br>6.78 $\pm$ 1.35<br>7.03 $\pm$ 1.21<br>7.08 $\pm$ 1.04<br>(log copies/ml, mean $\pm$ SD)   | 4.3 $\pm$ 2.6<br>3.9 $\pm$ 2.4<br>4.1 $\pm$ 2.7<br>3.7 $\pm$ 2.4<br>(xULN, mean $\pm$ SD) |
| <b>HBeAg Negative</b>               |                                                                             |                            |                                                                                                                                                                                                                                                                                                                                                                                                                       |                                                                                                              |                                                                                           |

| Author, Year, Design                                | Mean Age $\pm$ SD/<br>Median Age (Range)       | Male (%)       | Active Comparator                                                                                                                                                                                                                                                                                                                                                                | Baseline HBV DNA                                                                                                                                      | Baseline ALT                                                         |
|-----------------------------------------------------|------------------------------------------------|----------------|----------------------------------------------------------------------------------------------------------------------------------------------------------------------------------------------------------------------------------------------------------------------------------------------------------------------------------------------------------------------------------|-------------------------------------------------------------------------------------------------------------------------------------------------------|----------------------------------------------------------------------|
| Bozakaya et al. 2005                                | 39.0 $\pm$ 7.2 31.9 $\pm$ 11.1                 | 68<br>94       | <ul style="list-style-type: none"> <li>PLA (No treatment)</li> <li>LAM 100mg daily</li> </ul>                                                                                                                                                                                                                                                                                    | 4.2 $\times$ 10 <sup>3</sup> (1 $\times$ 10 <sup>2</sup> –3.6 $\times$ 10 <sup>5</sup> )<br>1.2 $\times$ 10 <sup>3</sup><br>copies/ml, median (range) | 48 (35–168)<br>63.5 (38–186)<br>IU/L, median (range)                 |
| Buti et al. 2016<br>DB                              | 45 $\pm$ 12<br>48 $\pm$ 10                     | 61<br>61       | <ul style="list-style-type: none"> <li>TAF 25mg daily</li> <li>TDF 300mg daily</li> </ul>                                                                                                                                                                                                                                                                                        | 5.7 $\pm$ 1.3<br>5.8 $\pm$ 1.3<br>(log <sub>10</sub> IU/ml, mean $\pm$ SD)                                                                            | 67(44-102)<br>67(47-102)<br>U/L, median (IQR)                        |
| Chan et al. 2007b<br>DB                             | 39 $\pm$ 11<br>39 $\pm$ 10                     | 83<br>84       | <ul style="list-style-type: none"> <li>PLA</li> <li>LAM 100mg daily</li> </ul>                                                                                                                                                                                                                                                                                                   | 5.6 $\pm$ 1.5<br>5.7 $\pm$ 1.6<br>(log copies/ml, mean $\pm$ SD)                                                                                      | 2.6 $\pm$ 2.3<br>2.1 $\pm$ 1.7<br>( $\times$ ULN, mean $\pm$ SD)     |
| Hadziyannis et al. 2003<br>DB                       | 45 $\pm$ 10.4<br>46 $\pm$ 9.8                  | 82<br>83       | <ul style="list-style-type: none"> <li>PLA</li> <li>ADV 10mg daily</li> </ul>                                                                                                                                                                                                                                                                                                    | 6.9 $\pm$ 1.0<br>6.9 $\pm$ 0.9<br>(log copies/ml, mean $\pm$ SD)                                                                                      | 149.9 $\pm$ 195.2<br>143.5 $\pm$ 125.3<br>(U/L, mean $\pm$ SD)       |
| Hou et al. 2015<br>DB                               | 36.4(18-66)<br>36.1(18-66)                     | 83.3<br>83.3   | <ul style="list-style-type: none"> <li>ADV 10mg daily</li> <li>TDF 300mg daily</li> </ul>                                                                                                                                                                                                                                                                                        | 7.0 $\pm$ 1.13<br>6.9 $\pm$ 1.18<br>(log <sub>10</sub> copies/ml, mean $\pm$ SD)                                                                      | 112.6 $\pm$ 80.3<br>133.4 $\pm$ 120.9<br>(U/L, mean $\pm$ SD)        |
| Jia et al. 2014<br>DB                               | 36(19-58)<br>38(20-56)                         | 86.4<br>85     | <ul style="list-style-type: none"> <li>LAM 100mg daily</li> <li>TBV 600mg daily</li> </ul>                                                                                                                                                                                                                                                                                       | 7.5 $\pm$ 0.3<br>7.8 $\pm$ 0.4<br>(log <sub>10</sub> copies/ml, mean $\pm$ SE)                                                                        | 177 $\pm$ 75.2<br>162 $\pm$ 23.9<br>(IU/L, mean $\pm$ SE)            |
| Kaymakoglu et al. 2007<br>Open-label                | 42.6 $\pm$ 10.9<br>43 $\pm$ 7.8                | 68.4<br>69     | <ul style="list-style-type: none"> <li>PEG<math>\alpha</math>-2b 1.5<math>\mu</math>g/kg weekly</li> <li>LAM 100mg daily + PEG<math>\alpha</math>-2b 1.5<math>\mu</math>g/kg weekly</li> </ul>                                                                                                                                                                                   | 182.3 $\pm$ 175.4<br>209.6 $\pm$ 207.8<br>(pg/ml, mean $\pm$ SD)                                                                                      | 130.4 $\pm$ 45<br>161.5 $\pm$ 127.4<br>(IU/L, mean $\pm$ SD)         |
| Lai et al. 2006<br>DB                               | 44 $\pm$ 11<br>44 $\pm$ 11                     | 75<br>76       | <ul style="list-style-type: none"> <li>LAM 100mg daily</li> <li>ETV 0.5mg daily</li> </ul>                                                                                                                                                                                                                                                                                       | 7.6 $\pm$ 1.7<br>7.6 $\pm$ 1.8<br>(log copies/ml, mean $\pm$ SD)                                                                                      | 143 $\pm$ 119.4<br>141 $\pm$ 114.7<br>(IU/L, mean $\pm$ SD)          |
| Lampetico et al. 2013<br>Open-label                 | 45 $\pm$ 10.2<br>44 $\pm$ 10.4<br>46 $\pm$ 8.6 | 65<br>87<br>72 | <ul style="list-style-type: none"> <li>PEG<math>\alpha</math>-2a 180<math>\mu</math>g weekly for 48 wks</li> <li>PEG<math>\alpha</math>-2a 180<math>\mu</math>g weekly for 48 wks then 135<math>\mu</math>g weekly for 48 wks</li> <li>(LAM 100mg + PEG<math>\alpha</math>-2a 180<math>\mu</math>g weekly) for 48 wks then PEG 135<math>\mu</math>g weekly for 48 wks</li> </ul> | 6.1 (2.1->8.0)<br>6.0 (2.6->8.0)<br>6.2 (3.5->8.0)<br>log <sub>10</sub> IU/ml, median (range)                                                         | 119 (34-897)<br>146 (51-897)<br>161 (34-897)<br>IU/L, median (range) |
| Lee et al. 2017<br>DB for 96 wks then<br>open-label | 45.7 $\pm$ 11.9<br>49.0 $\pm$ 7.8              | 84<br>75       | <ul style="list-style-type: none"> <li>ETV 0.5mg daily</li> <li>LAM 100mg daily</li> </ul>                                                                                                                                                                                                                                                                                       | 6.1 $\pm$ 0.8<br>5.8 $\pm$ 0.9<br>(log <sub>10</sub> copies/ml, mean $\pm$ SD)                                                                        | 110.5 $\pm$ 82.0<br>93.9 $\pm$ 58.5<br>(IU/L, mean $\pm$ SD)         |
| Liaw et al. 2009<br>DB                              | 43 (18-68)<br>43 (17-68)                       | 79<br>78       | <ul style="list-style-type: none"> <li>LAM 100mg daily</li> <li>TBV 600mg daily</li> </ul>                                                                                                                                                                                                                                                                                       | 7.4 $\pm$ 0.1<br>7.7 $\pm$ 0.1<br>(log <sub>10</sub> copies/ml, mean $\pm$ SE)                                                                        | 143.7 $\pm$ 8.7<br>137 $\pm$ 6.94<br>(IU/L, mean $\pm$ SE)           |

| Author, Year, Design                       | Mean Age $\pm$ SD/<br>Median Age (Range)        | Male (%)       | Active Comparator                                                                                                                                                                                                       | Baseline HBV DNA                                                                        | Baseline ALT                                                                     |
|--------------------------------------------|-------------------------------------------------|----------------|-------------------------------------------------------------------------------------------------------------------------------------------------------------------------------------------------------------------------|-----------------------------------------------------------------------------------------|----------------------------------------------------------------------------------|
| Lok et al. 2012<br>Open-label              | 40 $\pm$ 1.1<br>39 $\pm$ 1                      | 63.7<br>74.1   | <ul style="list-style-type: none"> <li>• ETV: 0.5mg daily</li> <li>• ETV 0.5mg daily + TDF 300mg daily</li> </ul>                                                                                                       | 6.09 $\pm$ 0.18<br>6.09 $\pm$ 0.15<br>(log <sub>10</sub> IU/ml, mean $\pm$ SE)          | 127 $\pm$ 7.3<br>158 $\pm$ 13.1<br>(U/L, mean $\pm$ SE)                          |
| Marcellin et al. 2004<br>Partial DB        | 40 $\pm$ 11.1<br>40 $\pm$ 11.7<br>41 $\pm$ 10.8 | 86<br>85<br>82 | <ul style="list-style-type: none"> <li>• LAM 100mg daily</li> <li>• PEG<math>\alpha</math>-2a 180<math>\mu</math>g weekly</li> <li>• LAM 100mg daily + PEG<math>\alpha</math>-2a 180<math>\mu</math>g weekly</li> </ul> | 7.24 $\pm$ 1.78<br>7.14 $\pm$ 1.84<br>7.35 $\pm$ 2.00<br>(log copies/ml, mean $\pm$ SD) | 105.7 $\pm$ 128.2<br>84.4 $\pm$ 85.9<br>90.8 $\pm$ 76.2<br>(IU/L, mean $\pm$ SD) |
| Marcellin et al. 2008<br>DB                | 43 $\pm$ 10.0<br>44 $\pm$ 10.6                  | 78<br>77       | <ul style="list-style-type: none"> <li>• ADV 10mg daily</li> <li>• TDF 300mg daily</li> </ul>                                                                                                                           | 6.98 $\pm$ 1.27<br>6.86 $\pm$ 1.31<br>(log <sub>10</sub> copies/ml, mean $\pm$ SD)      | 163.6 $\pm$ 146.02<br>127.5 $\pm$ 101.21<br>(IU/ml, mean $\pm$ SD)               |
| Papadopoulos et al.<br>2009                | 46.3<br>46.7                                    | 86<br>74       | <ul style="list-style-type: none"> <li>• PEG<math>\alpha</math>-2b 1.5<math>\mu</math>g/kg weekly</li> <li>• LAM 100mg daily + PEG<math>\alpha</math>-2b 1.5<math>\mu</math>g/kg weekly</li> </ul>                      | 6.16<br>5.78<br>(mean log <sub>10</sub> copies/ml)                                      | 96.5<br>135.7<br>(mean IU/ml)                                                    |
| Piccolo et al. 2009<br>DB                  | 45.9 $\pm$ 10.2<br>48.3 $\pm$ 10.7              | 60<br>73       | <ul style="list-style-type: none"> <li>• PEG<math>\alpha</math>-2a 1.5<math>\mu</math>g/kg weekly</li> <li>• PEG<math>\alpha</math>-2a 1.5<math>\mu</math>g/kg weekly + ADV 10mg/day</li> </ul>                         | 5.7 $\pm$ 0.9<br>5.9 $\pm$ 1.0<br>(log <sub>10</sub> IU/ml, mean $\pm$ SD)              | 3.18 $\pm$ 3.3<br>3.43 $\pm$ 2.7<br>(xULN, mean $\pm$ SD)                        |
| Tangkijvanich et al.<br>2016<br>Open-label | 40.0 $\pm$ 9.3<br>40.3 $\pm$ 9.8                | 68.3<br>73     | <ul style="list-style-type: none"> <li>• PEG<math>\alpha</math>-2b 1.5<math>\mu</math>g/kg weekly</li> <li>• ETV 0.5mg daily + PEG<math>\alpha</math>-2b 1.5<math>\mu</math>g/kg weekly</li> </ul>                      | 5.5 $\pm$ 0.8<br>5.4 $\pm$ 0.8<br>(log <sub>10</sub> IU/ml, mean $\pm$ SD)              | 75.5 $\pm$ 32.2<br>72.5 $\pm$ 40.0<br>(U/L, mean $\pm$ SD)                       |
| Tassopoulos et al.<br>1999<br>DB           | 44 (17-63)<br>42 (24-65)                        | 77<br>83       | <ul style="list-style-type: none"> <li>• PLA</li> <li>• LAM 100mg daily</li> </ul>                                                                                                                                      | 95.5 (1.3-3,900)<br>255 (1.3-18,000)<br>pg/ml, median (range)                           | 3.3 (0.7-12.5)<br>3.2 (0.6-16.4)<br>xULN, median (range)                         |
| Yao et al. 2007<br>DB                      | 30 $\pm$ 9<br>30 $\pm$ 9                        | 83<br>82       | <ul style="list-style-type: none"> <li>• LAM 100mg daily</li> <li>• ETV 0.5mg daily</li> </ul>                                                                                                                          | 7.59 $\pm$ 1.33<br>7.7 $\pm$ 1.28<br>(log copies/ml, mean $\pm$ SD)                     | 164 $\pm$ 83<br>225 $\pm$ 169<br>(U/L, mean $\pm$ SD)                            |

Abbreviations: DB, double-blind; ADV, adefovir; ETV, entecavir; LAM, lamivudine; PEG, pegylated interferon; PLA, placebo; TAF, tenofovir alafenamide; TBV, telbivudine; TDF, tenofovir disoproxil fumarate; HBV DNA, undetectable HBV DNA levels; ALT norm, normalization of serum alanine aminotransferase levels; HBeAg sero, hepatitis B e antigen seroconversion; HBeAg loss, hepatitis B e antigen loss; HBsAg loss, hepatitis B surface antigen loss
